# Supplementary material for: Selective, bifunctional Cu–WOx/Al2O3 catalyst for hydrodeoxygenation of fatty acids
Source: Royal Society of Chemistry journal article supplement (doi:10.1039/c9cy01939a), 2019-11-27
Supplement: c9cy01939a1.pdf [file c9cy01939a1.pdf]

## Electronic Supplementary Information

### Selective, bifunctional Cu-WO<sub>x</sub>/Al<sub>2</sub>O<sub>3</sub> catalyst for hydrodeoxygenation of fatty acids

Sagar Janampelli,<sup>a</sup> Govind Sethia<sup>b</sup> and Srinivas Darbha\*<sup>a</sup>

<sup>a</sup>*Catalysis and Inorganic Chemistry Division, CSIR-National Chemical Laboratory, Pune-411008, India.*

<sup>b</sup>*Inorganic Materials and Catalysis Division, CSIR-Central Salt & Marine Chemicals Research Institute, Gijubhai Bhadheka Marg, Bhavnagar-364002, India.*

---

- Fig. S1** Particle size histograms of reduced 10Cu/Al<sub>2</sub>O<sub>3</sub> and 10Cu-4WO<sub>x</sub>/Al<sub>2</sub>O<sub>3</sub> catalysts.
- Fig. S2** Representative nitrogen adsorption-desorption isotherms and pore size distribution curves.
- Table S1** Textural properties of reduced xCu/Al<sub>2</sub>O<sub>3</sub> and 10Cu-yWO<sub>x</sub>/Al<sub>2</sub>O<sub>3</sub> catalysts determined from N<sub>2</sub> physisorption studies.

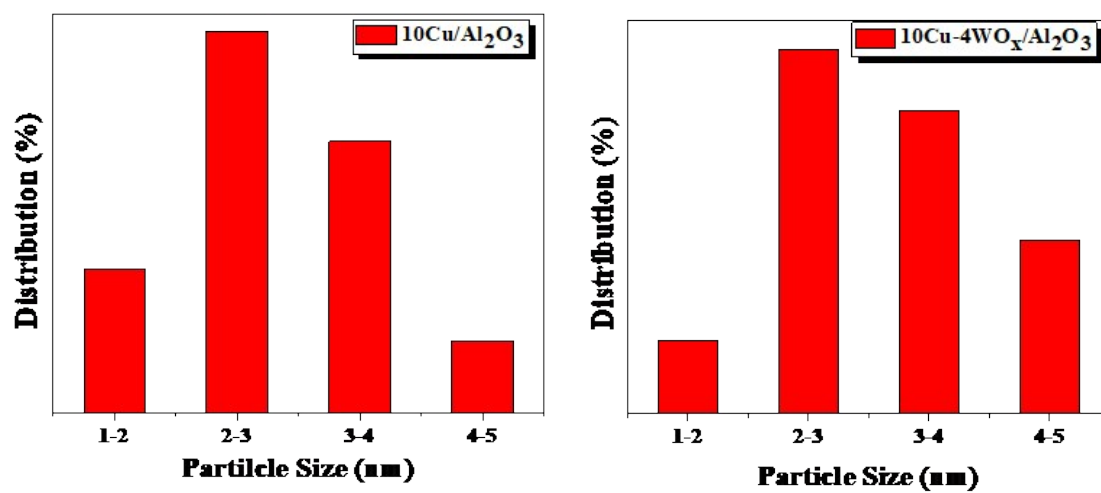

Fig. S1 Particle size histograms of reduced 10Cu/Al<sub>2</sub>O<sub>3</sub> and 10Cu-4WO<sub>x</sub>/Al<sub>2</sub>O<sub>3</sub> catalysts.

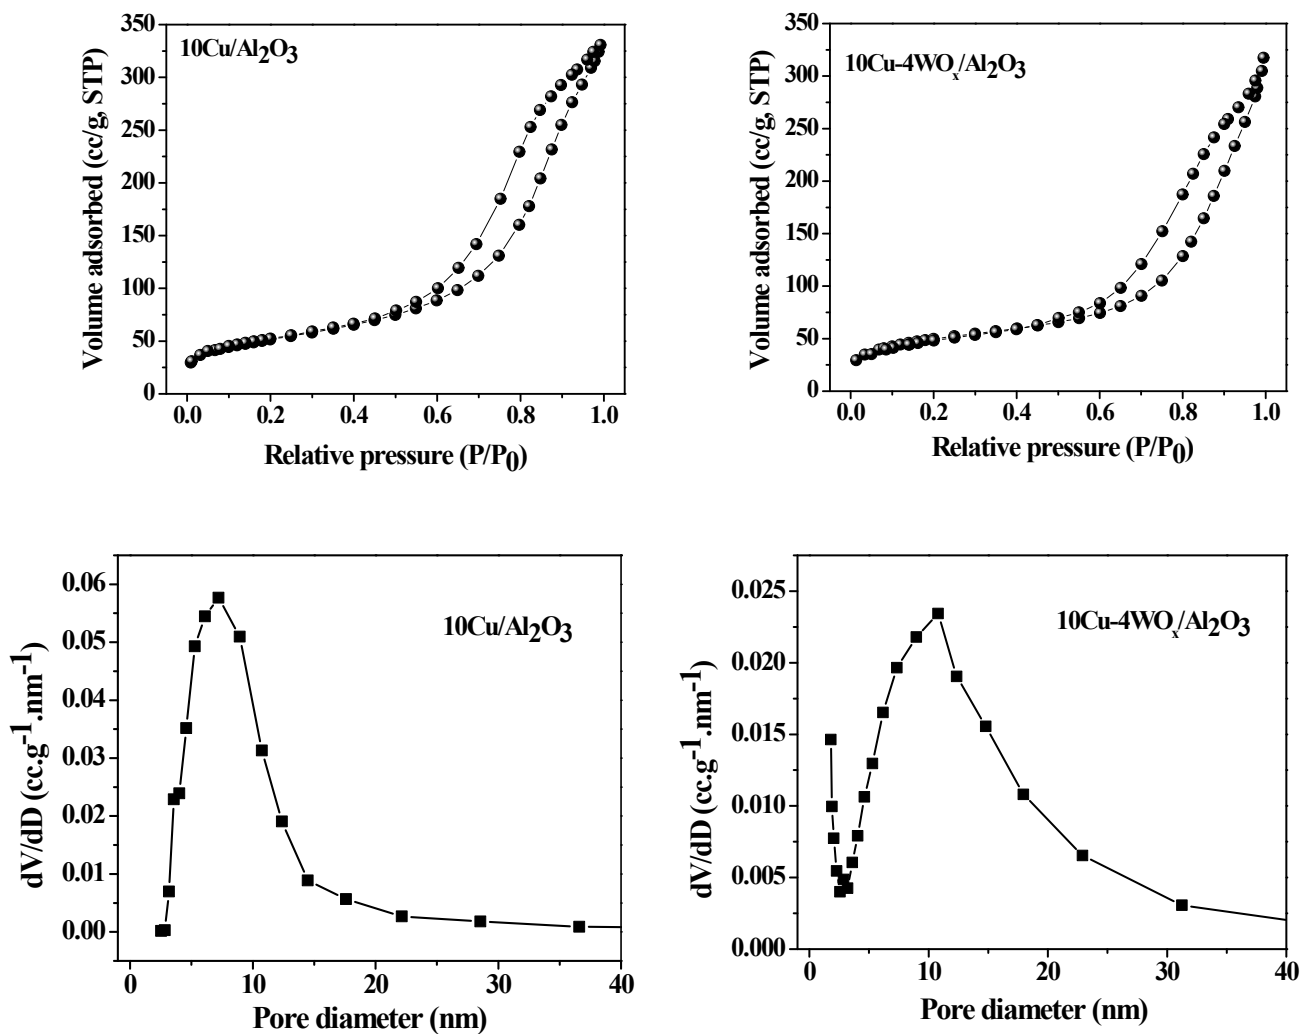

Fig. S2 Representative nitrogen adsorption-desorption isotherms and pore size distribution curves.

**Table S1** Textural properties of reduced  $x\text{Cu}/\text{Al}_2\text{O}_3$  and  $10\text{Cu}-y\text{WO}_x/\text{Al}_2\text{O}_3$  catalysts determined from  $\text{N}_2$  physisorption studies.

| Catalyst                                          | $S_{\text{BET}}$ ( $\text{m}^2/\text{g}$ ) <sup>a</sup> | Total pore volume (PV, $\text{cc}/\text{g}$ ) <sup>b</sup> | Average pore diameter (PD, $\text{nm}$ ) <sup>c</sup> | Surface density of tungsten ( $\rho_{\text{W}}$ ; atoms/ $\text{nm}^2$ ) |
|---------------------------------------------------|---------------------------------------------------------|------------------------------------------------------------|-------------------------------------------------------|--------------------------------------------------------------------------|
| $5\text{Cu}/\text{Al}_2\text{O}_3$                | 244                                                     | 0.56                                                       | 10.2                                                  | -                                                                        |
| $10\text{Cu}/\text{Al}_2\text{O}_3$               | 183                                                     | 0.48                                                       | 10.2                                                  | -                                                                        |
| $15\text{Cu}/\text{Al}_2\text{O}_3$               | 171                                                     | 0.42                                                       | 10.1                                                  | -                                                                        |
| $20\text{Cu}/\text{Al}_2\text{O}_3$               | 134                                                     | 0.34                                                       | 10.9                                                  | -                                                                        |
| $10\text{Cu}-4\text{WO}_x/\text{Al}_2\text{O}_3$  | 179                                                     | 0.43                                                       | 12.7                                                  | 0.73                                                                     |
| $10\text{Cu}-8\text{WO}_x/\text{Al}_2\text{O}_3$  | 168                                                     | 0.36                                                       | 10.7                                                  | 1.56                                                                     |
| $10\text{Cu}-12\text{WO}_x/\text{Al}_2\text{O}_3$ | 165                                                     | 0.41                                                       | 10.3                                                  | 2.38                                                                     |
| $10\text{Cu}-16\text{WO}_x/\text{Al}_2\text{O}_3$ | 159                                                     | 0.46                                                       | 11.5                                                  | 3.32                                                                     |

<sup>a</sup>Specific surface area ( $S_{\text{BET}}$ ) was calculated by the Brunauer-Emmett-Teller (BET) method using

<sup>a</sup> $P/P_0$  range between 0.01 and 0.2.

<sup>b</sup>Total pore volume (PV) was calculated from the adsorption isotherm at the relative pressure ( $P/P_0$ ) of 0.97.

<sup>c</sup>Average pore diameter (PD) was measured adopting BJH and adsorption isotherm.
